# Supplementary material for: Pan-Cancer Analyses Reveal Oncogenic Role and Prognostic Value of F-Box Only Protein 22
Source: PubMed Central journal article supplement (PMC8818750; doi:10.3389/fonc.2021.790912), 2022-01-24

**A****Consensus dataset**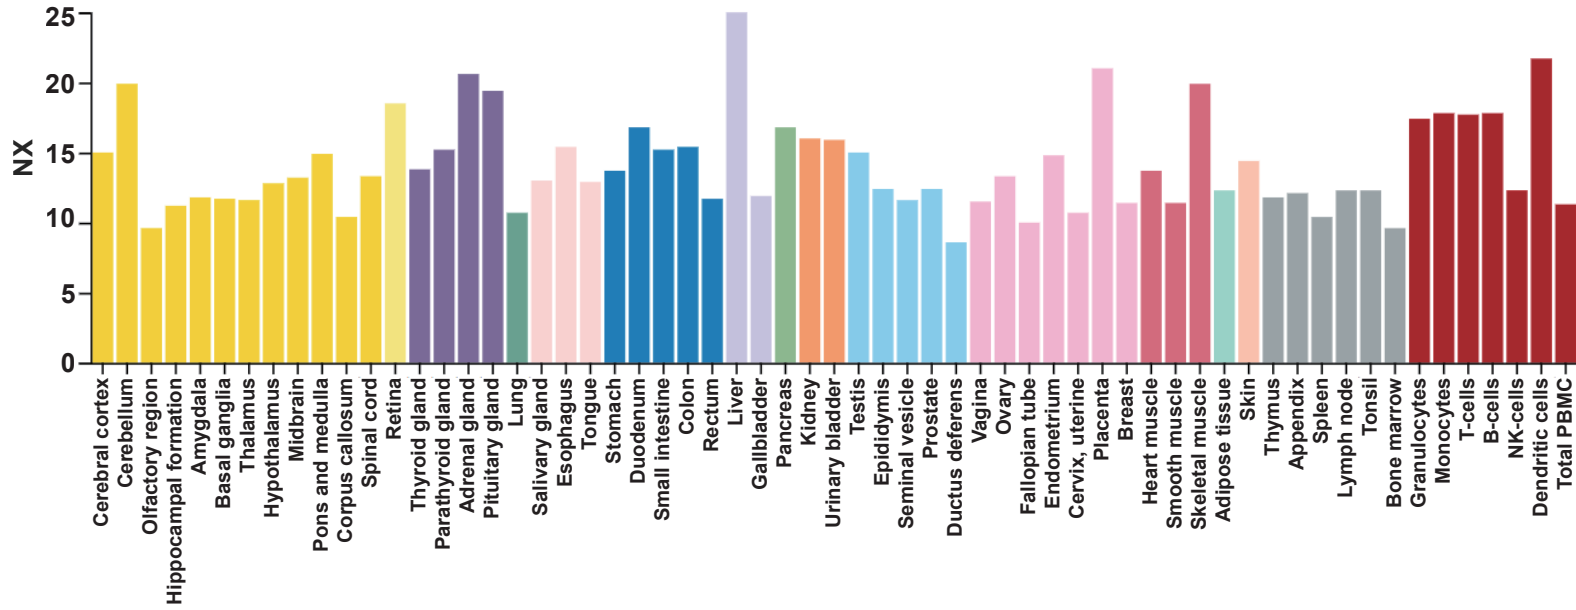**B****Single cell types**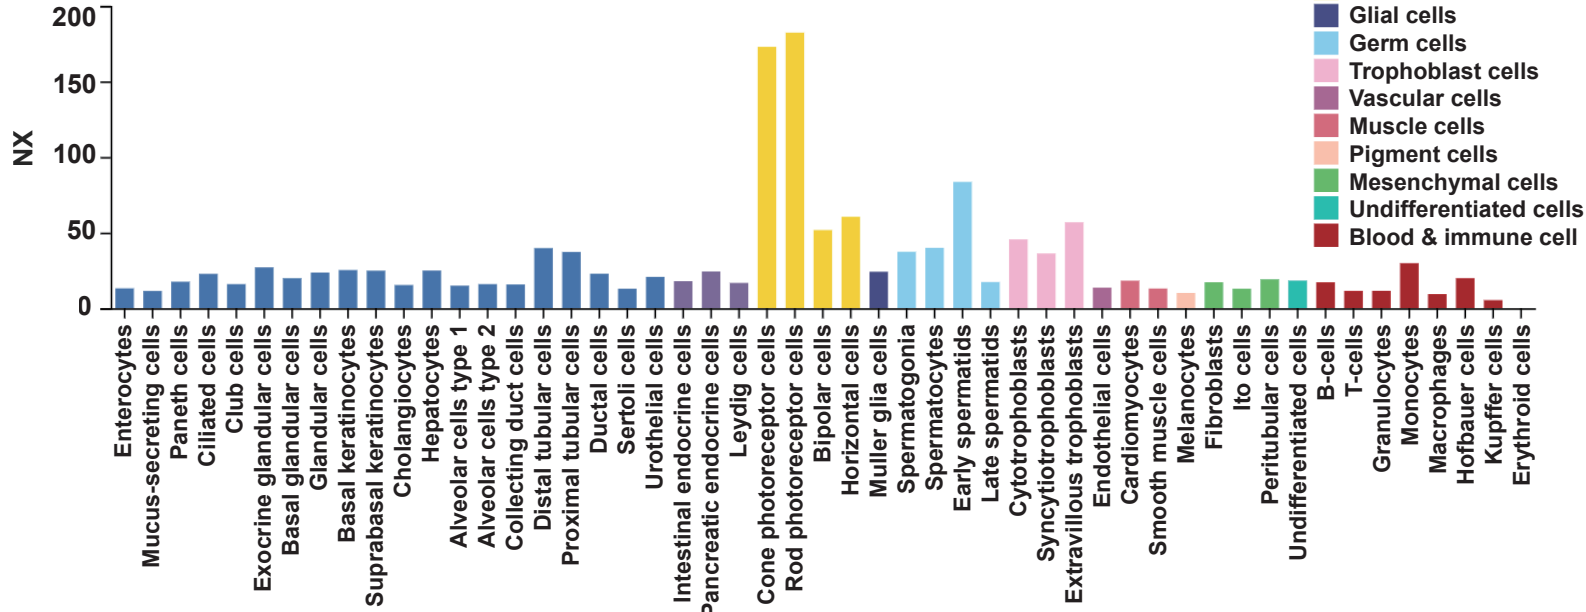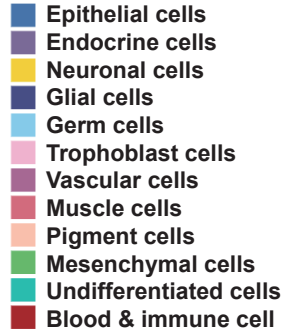

Supplement: Image_1.pdf [file Image_1.pdf]
