# Supplementary material for: Pan-Cancer Analyses Reveal Oncogenic Role and Prognostic Value of F-Box Only Protein 22
Source: PubMed Central journal article supplement (PMC8818750; doi:10.3389/fonc.2021.790912), 2022-01-24

**A**

Ranking of importance

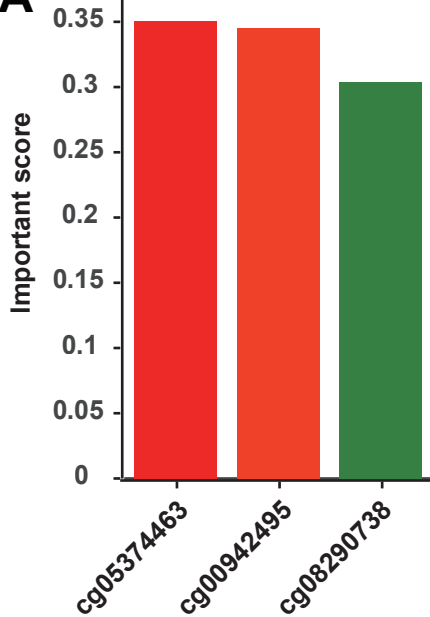**B**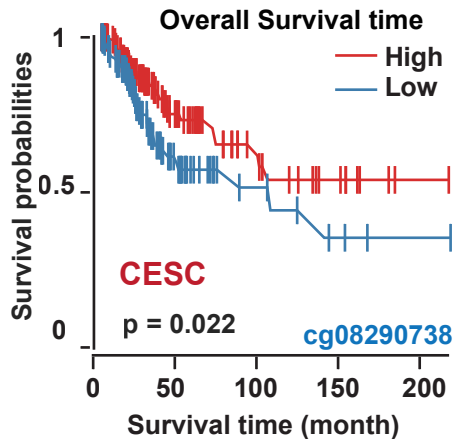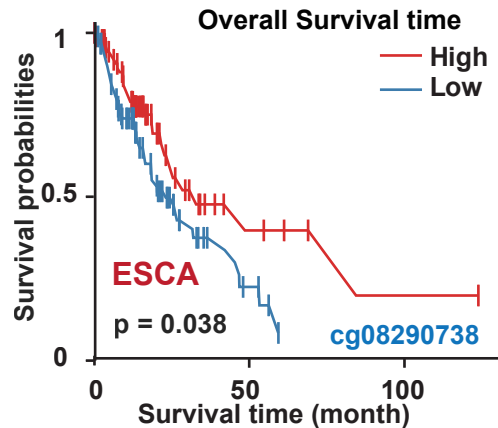**C**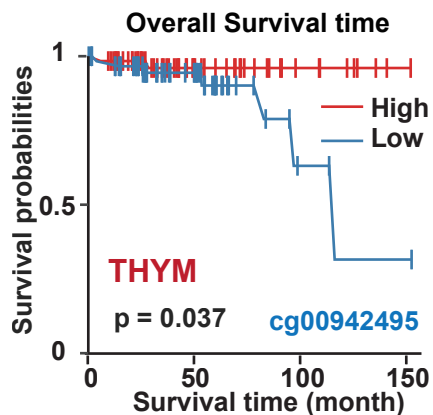**D**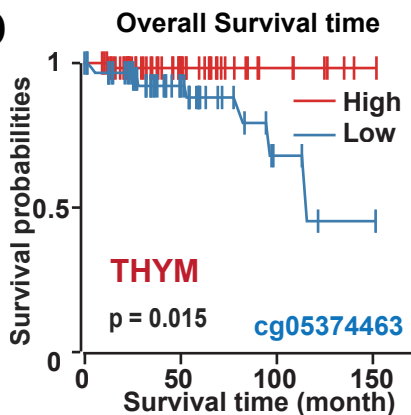

Supplement: Image_5.pdf [file Image_5.pdf]
